# Supplementary material for: Berufsbedingte Unterschiede bei COVID-19-Morbidität und -Mortalität in Deutschland. Eine Analyse von Krankenkassendaten von 3,17 Mio. Versicherten
Source: Springer Nature journal article supplement (doi:10.1007/s00103-023-03738-9), 2023-07-19
Supplement: MOESM1 [file 25821194]

# Berufsbedingte Unterschiede bei COVID-19-Morbidität und -Mortalität in Deutschland.

## Eine Analyse von Krankenkassendaten von 3,17 Mio. Versicherten

Morten Wahrendorf<sup>1</sup>, Valerie Schaps<sup>1</sup>, Marvin Reuter<sup>2</sup>, Jens Hoebel<sup>3</sup>, Benjamin Wachtler<sup>3</sup>, Josephine Jacob<sup>4</sup>, Marco Alibone<sup>4</sup>, Nico Dragano<sup>1</sup>

<sup>1</sup> Institut für Medizinische Soziologie, Centre for Health and Society, Medizinische Fakultät und Universitätsklinikum, Universität Düsseldorf, Deutschland

<sup>2</sup> Juniorprofessur für Soziologie, insb. Arbeit und Gesundheit, Fakultät für Wirtschafts- und Sozialwissenschaften, Otto-Friedrich-Universität Bamberg, Deutschland

<sup>3</sup> Fachgebiet Soziale Determinanten der Gesundheit, Abteilung für Epidemiologie und Gesundheitsmonitoring, Robert Koch-Institut, Berlin, Deutschland

<sup>4</sup> InGef - Institut für angewandte Gesundheitsforschung, Berlin GmbH, Berlin, Deutschland

## Onlinematerial

Abbildung S1: Flussdiagramm zur Auswahl der Studienpopulation. Quelle: Eigene Abbildung.

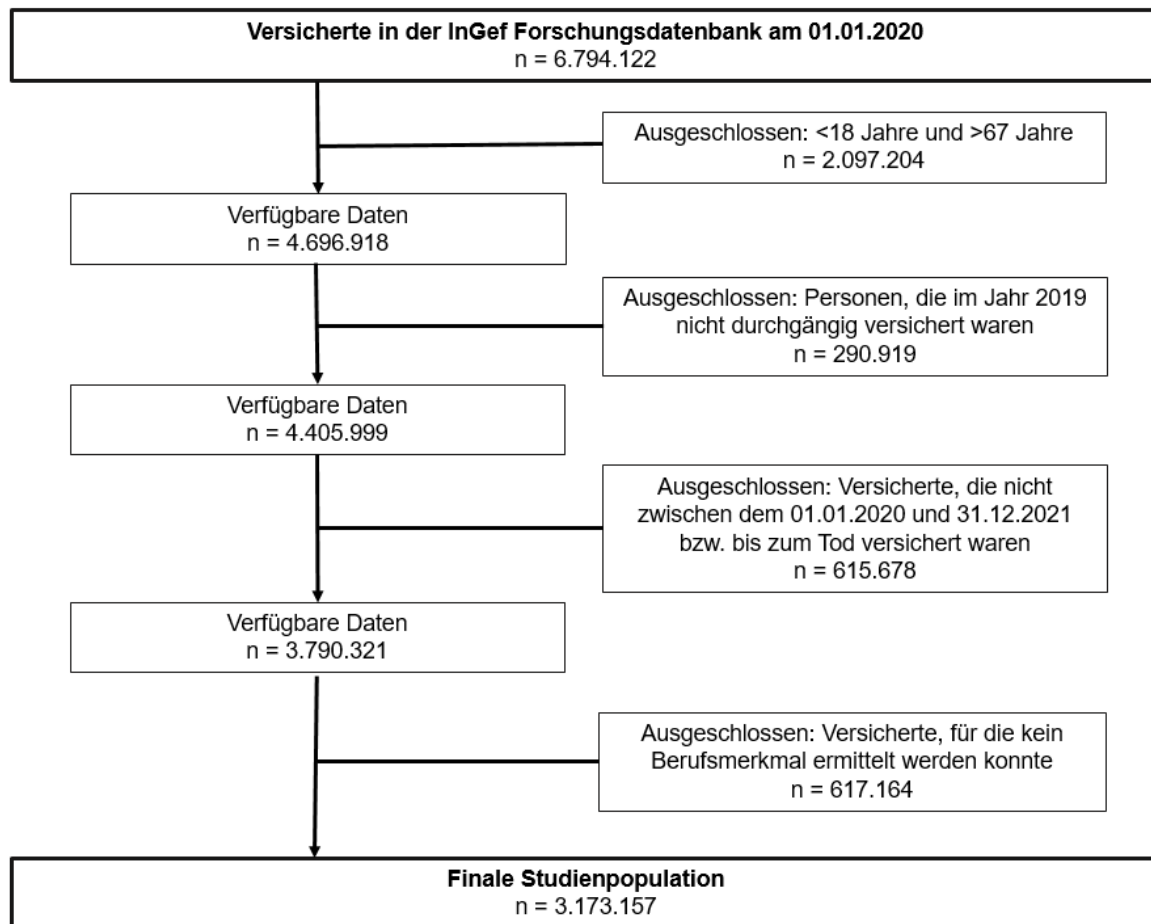

Tabelle S1. Vergleich Sozialversicherungspflichtig Beschäftigte und Studienpopulation. Werte für Gesamtbevölkerung beruhen auf eigenen Berechnung auf Basis der Angaben für Dezember 2019 der Bundesagentur für Arbeit für Sozialversicherungspflichtig Beschäftigte [39].

|                                                      | Kategorie oder Rangweite                                     | Studien-<br>population (%)        | Gesamt-<br>bevölkerung<br>(%) |
|------------------------------------------------------|--------------------------------------------------------------|-----------------------------------|-------------------------------|
| Berufssektoren                                       | Produktionsberufe                                            | 29,1                              | 26,7                          |
|                                                      | Personenbezogene Dienstleistungsberufe                       | 19,7                              | 24,1                          |
|                                                      | Kaufmännische und unternehmensbezogene Dienstleistungsberufe | 35,4                              | 31,7                          |
|                                                      | IT- und naturwissenschaftliche Dienstleistungsberufe         | 4,3                               | 4,0                           |
|                                                      | Sonstige wirtschaftliche Dienstleistungsberufe               | 11,5                              | 13,5                          |
|                                                      | Berufssegmente                                               | Land-, Forst- und Gartenbauberufe | 0,9                           |
| Fertigungsberufe                                     |                                                              | 7,5                               | 7,1                           |
| Fertigungstechnische Berufe                          |                                                              | 16,2                              | 12,2                          |
| Bau- und Ausbauberufe                                |                                                              | 4,5                               | 6,0                           |
| Lebensmittel- und Gastgewerbeberufe                  |                                                              | 3,7                               | 5,0                           |
| Medizinische u. nicht-medizinische Gesundheitsberufe |                                                              | 8,8                               | 10,8                          |
| Soziale und kulturelle Dienstleistungsberufe         |                                                              | 7,3                               | 8,3                           |
| Handelsberufe                                        |                                                              | 9,5                               | 9,5                           |
| Berufe in Unternehmensführung und -organisation      |                                                              | 14,9                              | 12,9                          |
| Unternehmensbezogene Dienstleistungsberufe           |                                                              | 11,0                              | 9,2                           |
| IT- und naturwissenschaftliche Dienstleistungsberufe |                                                              | 4,3                               | 4,0                           |
| Sicherheitsberufe                                    |                                                              | 1,1                               | 1,1                           |
| Verkehrs- und Logistikberufe                         |                                                              | 8,5                               | 9,8                           |
| Reinigungsberufe                                     |                                                              | 1,9                               | 2,6                           |
| Anforderungsniveau                                   | HelferInnen                                                  | 12,3                              | 15,3                          |
|                                                      | Fachkräfte                                                   | 61,8                              | 58,3                          |
|                                                      | SpezialistInnen                                              | 14,3                              | 12,9                          |
|                                                      | ExpertInnen                                                  | 11,6                              | 13,5                          |
| Leitungsfunktion                                     | Aufsichts- oder Führungskräfte                               | 4,9                               | 5,1                           |
|                                                      | Keine Leitungsfunktion                                       | 95,1                              | 94,9                          |

Tabelle S2. Altersstandardisierte kumulative Inzidenzen (ASKI) nach Berufsmerkmalen für die drei Outcomes COVID-19-Erkrankung, Krankenhausaufenthalt und Mortalität. Die Altersstandardisierung erfolgt auf Basis der jeweiligen Inzidenzen in fünf Altersgruppen („18 – 29“, „30 – 39“, „40 – 49“, „50 – 59“, und „60 – 67“). Aufgrund geringer Fallzahlen für Krankenhausaufenthalt und Mortalität, bei denen Werte zwischen 1 und 4 aus Datenschutzgründen nicht weiter spezifiziert werden, können in diesen Fällen keine Altersstandardisierte kumulative Inzidenzen bestimmt werden.

|                    |                                                          | Frauen     |                   |            | Männer     |               |            |
|--------------------|----------------------------------------------------------|------------|-------------------|------------|------------|---------------|------------|
|                    |                                                          | Erkrankung | KH-<br>Aufenthalt | Mortalität | Erkrankung | KH-Aufenthalt | Mortalität |
|                    |                                                          |            | ASKI              | ASKI       |            | ASKI          | ASKI       |
| Berufssektoren     | Produktionsberufe                                        | 6.365      | 253               | .          | 6.819      | 334           | .          |
|                    | Personenbezogene Dienstleistungsberufe                   | 8.507      | 253               | 11         | 6.680      | 319           | .          |
|                    | Kaufmännische und unternehmensbez. Dienstleistungsberufe | 5.941      | 167               | .          | 5.466      | 233           | .          |
|                    | IT- und naturwiss. Dienstleistungsberufe                 | 5.090      | 169               | .          | 5.079      | 220           | .          |
|                    | Sonstige wirtschaftliche Dienstleistungsberufe           | 7.075      | 352               | .          | 6.358      | 429           | .          |
| Berufssegmente     | Land-, Forst- und Gartenbauberufe                        | 4.746      | .                 | 0          | 4.697      | .             | .          |
|                    | Fertigungsberufe                                         | 6.838      | 238               | .          | 7.828      | 425           | .          |
|                    | Fertigungstechnische Berufe                              | 6.421      | 277               | .          | 6.591      | 302           | .          |
|                    | Bau- und Ausbauberufe                                    | 5.882      | .                 | 0          | 6.422      | 313           | .          |
|                    | Lebensmittel- und Gastgewerbeberufe                      | 6.285      | 271               | 15         | 5.937      | 402           | .          |
|                    | Med. u. nicht-med. Gesundheitsberufe                     | 9.154      | 281               | .          | 7.913      | 317           | .          |
|                    | Soziale und kulturelle Dienstleistungsberufe             | 8.533      | 210               | .          | 6.336      | 253           | .          |
|                    | Handelsberufe                                            | 6.375      | 198               | .          | 5.854      | 257           | .          |
|                    | Berufe in Unternehmensführung und -organisation          | 5.813      | 154               | .          | 5.546      | 249           | .          |
|                    | Unternehmensbezogene Dienstleistungsberufe               | 5.742      | 156               | .          | 4.968      | 182           | .          |
|                    | IT- und naturwiss. Dienstleistungsberufe                 | 5.090      | 169               | .          | 5.079      | 220           | .          |
|                    | Sicherheitsberufe                                        | 6.071      | .                 | 0          | 6.229      | .             | .          |
|                    | Verkehrs- und Logistikberufe                             | 6.597      | 266               | .          | 6.403      | 429           | .          |
|                    | Reinigungsberufe                                         | 7.970      | 507               | .          | 6.086      | 572           | .          |
| Anforderungsniveau | HelferInnen                                              | 7.873      | 353               | .          | 6.917      | 487           | .          |
|                    | Fachkräfte                                               | 7.025      | 204               | .          | 6.578      | 339           | .          |
|                    | SpezialistInnen                                          | 5.889      | 174               | .          | 5.831      | 239           | .          |
|                    | ExpertInnen                                              | 5.710      | 154               | .          | 5.045      | 196           | .          |
| Leitungsfunktion   | Aufsichtskräfte                                          | 5.922      | .                 | .          | 6.308      | .             | .          |
|                    | Führungskräfte                                           | 5.922      | .                 | .          | 6.019      | .             | .          |
|                    | Keine Leitungsfunktion                                   | 6.881      | 229               | .          | 6.283      | 333           | 31         |

Tabelle S3. COVID-19-Krankenhausaufenthalt nach Berufsmerkmalen für Frauen und Männer mit SARS-CoV-2-Infektion: Anzahl der Beobachtungen (Anzahl), Anzahl der Fälle (Fälle), kumulative Inzidenzen pro 100.000.

|                    |                                                          | Frauen |       |                                | Männer |        |                                |
|--------------------|----------------------------------------------------------|--------|-------|--------------------------------|--------|--------|--------------------------------|
|                    |                                                          | Anzahl | Fälle | Kum. Inzidenz<br>(pro 100.000) | Anzahl | Fälle  | Kum. Inzidenz<br>(pro 100.000) |
| Berufssektoren     | Produktionsberufe                                        | 7.699  | 306   | 3.975                          | 52.585 | 2790   | 5.306                          |
|                    | Personenbezogene Dienstleistungsberufe                   | 40.569 | 1165  | 2.872                          | 9.579  | 406    | 4.238                          |
|                    | Kaufmännische und unternehmensbez. Dienstleistungsberufe | 41.164 | 1179  | 2.864                          | 21.216 | 942    | 4.440                          |
|                    | IT- und naturwiss. Dienstleistungsberufe                 | 1.623  | 51    | 3.142                          | 5.161  | 213    | 4.127                          |
|                    | Sonstige wirtschaftliche Dienstleistungsberufe           | 7.729  | 429   | 5.551                          | 14.972 | 1181   | 7.888                          |
| Berufssegmente     | Land-, Forst- und Gartenbauberufe                        | 456    | 12    | 2.632                          | 902    | 47     | 5.211                          |
|                    | Fertigungsberufe                                         | 2.505  | 91    | 3.633                          | 15.031 | 909    | 6.048                          |
|                    | Fertigungstechnische Berufe                              | 4.133  | 179   | 4.331                          | 28.441 | 1397   | 4.912                          |
|                    | Bau- und Ausbauberufe                                    | 605    | 24    | 3.967                          | 8.211  | 437    | 5.322                          |
|                    | Lebensmittel- und Gastgewerbeberufe                      | 4.333  | 185   | 4.270                          | 2.723  | 159    | 5.839                          |
|                    | Med. u. nicht-med. Gesundheitsberufe                     | 21.525 | 624   | 2.899                          | 3.397  | 120    | 3.533                          |
|                    | Soziale und kulturelle Dienstleistungsberufe             | 14.711 | 356   | 2.420                          | 3.459  | 127    | 3.672                          |
|                    | Handelsberufe                                            | 11.493 | 360   | 3.132                          | 6.617  | 288    | 4.352                          |
|                    | Berufe in Unternehmensführung und -organisation          | 16.936 | 475   | 2.805                          | 8.869  | 432    | 4.871                          |
|                    | Unternehmensbezogene Dienstleistungsberufe               | 12.735 | 344   | 2.701                          | 5.730  | 222    | 3.874                          |
|                    | IT- und naturwiss. Dienstleistungsberufe                 | 1.623  | 51    | 3.142                          | 5.161  | 213    | 4.127                          |
|                    | Sicherheitsberufe                                        | 537    | 27    | 5.028                          | 1.416  | 107    | 7.556                          |
|                    | Verkehrs- und Logistikberufe                             | 3.686  | 157   | 4.259                          | 12.810 | 999    | 7.799                          |
| Reinigungsberufe   | 3.506                                                    | 245    | 6.988 | 746                            | 75     | 10.054 |                                |
| Anforderungsniveau | HelferInnen                                              | 15.364 | 746   | 4.856                          | 12.599 | 898    | 7.128                          |
|                    | Fachkräfte                                               | 65.077 | 1888  | 2.901                          | 64.130 | 3474   | 5.417                          |
|                    | SpezialistInnen                                          | 10.283 | 290   | 2.820                          | 15.581 | 705    | 4.525                          |
|                    | ExpertInnen                                              | 8.061  | 206   | 2.556                          | 11.204 | 455    | 4.061                          |
| Leitungsfunktion   | Aufsichtskräfte                                          | 1.107  | 31    | 2.800                          | 3.733  | 173    | 4.634                          |
|                    | Führungskräfte                                           | 1.227  | 47    | 3.830                          | 2.991  | 142    | 4.748                          |
|                    | Keine Leitungsfunktion                                   | 99.061 | 3336  | 3.368                          | 97.927 | 5441   | 5.556                          |

Tabelle S4. COVID-19-Mortalität nach Berufsmerkmalen für Frauen und Männer mit SARS-CoV-2-Infektion: Anzahl der Beobachtungen (Anzahl), Anzahl der Fälle (Fälle), kumulative Inzidenzen pro 100.000.

|                    |                                                          | Frauen |       |                                | Männer |       |                                |
|--------------------|----------------------------------------------------------|--------|-------|--------------------------------|--------|-------|--------------------------------|
|                    |                                                          | Anzahl | Fälle | Kum. Inzidenz<br>(pro 100.000) | Anzahl | Fälle | Kum. Inzidenz<br>(pro 100.000) |
| Berufssektoren     | Produktionsberufe                                        | 7.699  | 22    | 286                            | 52.585 | 253   | 481                            |
|                    | Personenbezogene Dienstleistungsberufe                   | 40.569 | 49    | 121                            | 9.579  | 23    | 240                            |
|                    | Kaufmännische und unternehmensbez. Dienstleistungsberufe | 41.164 | 47    | 114                            | 21.216 | 73    | 344                            |
|                    | IT- und naturwiss. Dienstleistungsberufe                 | 1.623  | <5    | .                              | 5.161  | 16    | 310                            |
|                    | Sonstige wirtschaftliche Dienstleistungsberufe           | 7.729  | 25    | 323                            | 14.972 | 128   | 855                            |
| Berufssegmente     | Land-, Forst- und Gartenbauberufe                        | 456    | 0     | 0                              | 902    | <5    | .                              |
|                    | Fertigungsberufe                                         | 2.505  | 9     | 359                            | 15.031 | 97    | 645                            |
|                    | Fertigungstechnische Berufe                              | 4.133  | 13    | 315                            | 28.441 | 116   | 408                            |
|                    | Bau- und Ausbauberufe                                    | 605    | 0     | 0                              | 8.211  | 37    | 451                            |
|                    | Lebensmittel- und Gastgewerbeberufe                      | 4.333  | 10    | 231                            | 2.723  | 11    | 404                            |
|                    | Med. u. nicht-med. Gesundheitsberufe                     | 21.525 | 22    | 102                            | 3.397  | <5    | .                              |
|                    | Soziale und kulturelle Dienstleistungsberufe             | 14.711 | 17    | 116                            | 3.459  | 8     | 231                            |
|                    | Handelsberufe                                            | 11.493 | 11    | 96                             | 6.617  | 18    | 272                            |
|                    | Berufe in Unternehmensführung und -organisation          | 16.936 | 23    | 136                            | 8.869  | 35    | 395                            |
|                    | Unternehmensbezogene Dienstleistungsberufe               | 12.735 | 13    | 102                            | 5.730  | 20    | 349                            |
|                    | IT- und naturwiss. Dienstleistungsberufe                 | 1.623  | <5    | .                              | 5.161  | 16    | 310                            |
|                    | Sicherheitsberufe                                        | 537    | 0     | 0                              | 1.416  | 15    | 1.059                          |
|                    | Verkehrs- und Logistikberufe                             | 3.686  | 12    | 326                            | 12.810 | 106   | 827                            |
| Reinigungsberufe   | 3.506                                                    | 13     | 371   | 746                            | 7      | 938   |                                |
| Anforderungsniveau | HelferInnen                                              | 15.364 | 39    | 254                            | 12.599 | 83    | 659                            |
|                    | Fachkräfte                                               | 65.077 | 83    | 128                            | 64.130 | 319   | 497                            |
|                    | SpezialistInnen                                          | 10.283 | 15    | 146                            | 15.581 | 58    | 372                            |
|                    | ExpertInnen                                              | 8.061  | 9     | 112                            | 11.204 | 33    | 295                            |
| Leitungsfunktion   | Aufsichtskräfte                                          | 1.107  | <5    | .                              | 3.733  | 16    | 429                            |
|                    | Führungskräfte                                           | 1.227  | <5    | .                              | 2.991  | 16    | 535                            |
|                    | Keine Leitungsfunktion                                   | 99.061 | 168   | 170                            | 97.927 | 501   | 512                            |
